# Supplementary material for: Teaching computer architecture by designing and simulating processors from their bits and bytes
Source: PeerJ journal article supplement (doi:10.7717/peerj-cs.1818), 2024-02-19
Supplement: Supplementary.pdf [file Supplementary.pdf]

## 1 SUPPLEMENTARY

2 The supplementary material is divided into three distinct sections: **Section A Architecture**  
3 **Details** offers comprehensive information on the MuSe and DoMe architectures, encompassing  
4 details on the multiplication algorithm, ALU design, and data path control signals. In **Section B**  
5 **Simulator Details** we provide a detailed breakdown of the simulator structures through class  
6 descriptions. Lastly, **Section C Survey** delves into the specifics of the survey questions and the  
7 corresponding responses.

## 8 A ARCHITECTURE DETAILS

### 9 A.1 MuSe Architecture Design

10 In this section, we present detailed information on the multiplication algorithm, ALU design,  
11 data path, and control signals within the MuSe Architecture. The architecture's instructions, as  
12 outlined in Table 1, are further elaborated in Table 2, providing a comprehensive explanation  
13 for each instruction. Notably, the MuSe Architecture includes an instruction referred to as  
14 *syscall*, which, while not mandatory for simulator functionality, serves the purpose of enabling  
15 programmers to display register contents on an LCD screen when invoked. It's worth mentioning  
16 that the *jr* and *syscall* instructions are exceptions within the architecture, as they do not make  
17 use of target and destination registers; however, they are categorized under the R-Format due to  
18 their utilization of source registers.

#### 19 A.1.1 MuSe Architecture: The Multiplication Algorithm

20 Multiplication operations can be computationally intensive, often requiring significant pro-  
21 cessing time within the Arithmetic Logic Unit (ALU). In the MuSe Architecture, our approach  
22 to handling multiplication tasks follows the iterative algorithm proposed by Patterson and  
23 Hennessy, 2016. This methodology implements multiplication iteratively, utilizing registers and  
24 adders, as depicted in Fig. 1. To accommodate this iterative approach, the MuSe Architecture  
25 incorporates a specialized multiplication unit within the ALU. This unit comprises eight shift  
26 registers and eight 8-bit adders, tailored to efficiently handle multiplication operations.

#### 27 A.1.2 MuSe Architecture: The ALU Design

28 The Arithmetic Logic Unit (ALU) serves as the central component of the CPU, responsible  
29 for executing all computational tasks. Within the MuSe Architecture, the ALU manages its  
30 operations through two input ports, referred to as input A and input B, along with an output  
31 port named output C. The ALU is highly versatile and capable of performing a wide array of  
32 calculations. The type of calculation to be executed is determined by the 3-bit ALU control  
33 lines denoted as F0, F1, and F2. These control lines are governed by the ALUOp control signal,  
34 which is introduced in the data path and changes dynamically as each incoming instruction is  
35 decoded.

36 Table 3 presents a comprehensive list of mathematical operations supported by the MuSe  
37 Architecture, along with their corresponding control line values. MuSe Architecture's ALU  
38 design accommodates eight distinct operations, each represented by specific combinations of  
39 these three control lines.

#### 40 A.1.3 MuSe Architecture: The Data-path and Control Signals

41 The data-path within a processor serves as the central framework that interconnects essential  
42 hardware components, including functional units like the ALU, adders, memory, and registers.  
43 It is also equipped with a set of control signals that facilitate the coordination of different CPU  
44 units. For instance, when the load word (*lw*) instruction is executed, setting the memory read  
45 control signal to 1 enables reading data from memory. When designing the data-path for MuSe  
46 Architecture, the developers drew inspiration from the original MIPS data-path.

47 In the conventional MIPS architecture, there are eight distinct control signals (MIPS, 2001).  
48 However, in the design of MuSe Architecture, 11 control signals are integrated to accommodate  
49 various instructions effectively. These additional control signals, in addition to those inherited  
50 from traditional MIPS architecture, include the System Call (*syscall*), Jump Register (*JumReg*),  
51 and Shift Register (*Shift Reg*) control signals. Control signal values for each instruction in MuSe

52 Architecture are thoughtfully compiled in Table 4, aiming to facilitate and guide researchers in  
53 replicating the MuSe Architecture design.

## 54 A.2 DoMe Architecture Design

55 In this section, we delve into an in-depth exploration of the multiplication algorithm, ALU  
56 design, data path, and control signals incorporated within the DoMe Architecture.

57 The instructions utilized in the DoMe architecture are thoughtfully laid out in Table 2,  
58 accompanied by their usage in desktop simulators. Notably, it is important to highlight that the  
59 suffix “-c” is exclusive to the application in R-type instructions.

### 60 A.2.1 DoMe Architecture: The Multiplication Algorithm

61 In this section, we delve into the multiplication algorithm employed in the DoMe Architecture  
62 design phase. Following extensive research, the DoMe Architecture designers initially opted  
63 for the Wallace Tree multiplication method (Wallace, 1964). However, during the design phase  
64 presentation, their project co-advisor recommended an alternative multiplication approach.  
65 The advisor’s advice was grounded in the realization that implementing an 8-bit Wallace  
66 Tree multiplier would entail significant costs and complexities, potentially posing challenges  
67 during the planned physical implementation phase. Consequently, the DoMe Architecture  
68 designers pivoted to adopt the multiplication algorithm suggested by the MuSe Architecture in  
69 **Section A.1.1 MuSe Architecture: The Multiplication Algorithm** to enhance feasibility and  
70 practicality.

### 71 A.2.2 DoMe Architecture: The ALU Design

72 DoMe Architecture has been meticulously crafted to provide support for a broader spectrum  
73 of instructions compared to the MuSe Architecture. Consequently, the repertoire of DoMe  
74 Architecture instructions includes division and exclusive or (*xor*) operations, in addition to  
75 the other eight operations. Recognizing the challenge of representing ten different operations  
76 with merely three control lines, the DoMe Architecture designers astutely incorporated an  
77 additional control line (F3). This design choice resulted in six unused control signals. Further  
78 elaboration on ALU operations and their corresponding control line values can be found in the  
79 supplementary materials. Furthermore, the ALU operation list for the DoMe Architecture, as  
80 delineated in Table 3, encompasses a more extensive array of operations and includes the ALU  
81 control lines (F3), a notable expansion in comparison to MuSe Architecture’s ALU Design.

### 82 A.2.3 DoMe Architecture: The Data-path & Control Signals

83 In this section, we delve into the DoMe Architecture’s distinctive approach to designing its  
84 data-path and control signals. As previously highlighted in Section 3.2.4, the traditional  
85 MIPS architecture encompasses eight distinct control signals. However, the MuSe Architecture  
86 augmented this count to 11. In contrast, the DoMe Architecture streamlined its control signals  
87 to a total of seven, achieved by the elimination of the Register Destination (RegDst) and  
88 Memory to Register (MemtoReg) control signals. An additional control signal, known as “jump,”  
89 was introduced to facilitate the management of jump instructions. To accommodate DoMe  
90 architecture, all unit and control signal connections in the MIPS data-path were meticulously  
91 revised. Much like in the MuSe Architecture, the control signal values pertinent to DoMe  
92 Architecture can be found in Table 5.

## 93 B SIMULATOR DETAILS

### 94 B.1 MuSe Architecture Simulator

95 The architecture of the MuSe simulator is intricately composed of several well-defined classes,  
96 each dedicated to a specific aspect of the simulation. These classes encompass ALU, Controller  
97 Unit, Instructions, Instruction Memory, Data Memory, Register File, Program Counter, and  
98 Processor. Within the ALU class, the designers have favored the use of elementary operators for  
99 computational tasks rather than embarking on the intricate endeavor of implementing complex  
100 logic circuits such as full adders and multiplication logic. The Controller Unit class assumes the  
101 pivotal responsibility of assigning control signals to individual instructions through a meticu-  
102 lous evaluation of opcodes, *is\_jump* flags, and *is\_imm* values. The MuSe simulator primarily

103 revolves around three distinct instruction types, namely R-type, I-type, and J-type instructions.  
104 To streamline the management of shared attributes across these instruction types, the simulator  
105 extends these instructions from an abstract class named Instruction. The Instruction Memory is  
106 constructed as an array of instructions, initialized upon program commencement. Meanwhile,  
107 the Data Memory module houses a two-dimensional byte array augmented with a stack pointer,  
108 effectively governing all essential memory read and write operations. The Register File class  
109 boasts a roster of registers, encompassing eight pre-defined registers and proficiently manages  
110 both read and write operations in alignment with control signals. The Program Counter class  
111 is characterized by its simplicity, storing merely an integer value to represent the program  
112 counter value and adeptly governing its manipulation. The Processor class orchestrates the  
113 harmonious interaction of the previously mentioned classes, meticulously choreographing their  
114 workflow. The program commences with the initialization of instruction memory, and as it  
115 unfurls, the processor diligently fetches instructions in a loop. Notably, in the MuSe architecture,  
116 the absence of a pipeline implementation means that the simulator only progresses to the next  
117 instruction once the current instruction is successfully executed. The program culminates either  
118 when all instructions are executed or in the event of an encountered error.

## 119 B.2 DoMe Architecture Simulator

120 The intricate structure of the DoMe Simulator consists of an array of classes, with certain classes  
121 sharing functional similarities with their counterparts in the MuSe Simulator. The essential  
122 classes used in the DoMe Simulator include Registers, Instructions, Data Memory, Instruction  
123 Memory, Definitions, Instruction Functions, Assembler, and Processor. The Registers class,  
124 much like in the MuSe Simulator, serves as the repository for registers, with their initialization  
125 taking place here. The Instructions class stores the assembly instructions within an array and  
126 enables their retrieval by the Processor class through a systematic loop. Data Memory, much  
127 like its MuSe counterpart, plays a pivotal role in memory operations, with memory contents  
128 being stored within an array. It's noteworthy that, unlike the MuSe Simulator, the DoMe  
129 Simulator foregoes the inclusion of a dedicated ALU class. Instead, it features the Instruction  
130 Functions class, which defines a function for each instruction operation and establishes a linkage  
131 between function and instruction. This unique approach allows the simulator to directly access  
132 these functions and execute the requisite operations. The Assembler class within the DoMe  
133 Simulator shares similarities with the Control Unit class in the MuSe simulator, responsible for  
134 the assignment of control bits, opcodes, registers, and other essential values. The Definitions  
135 class serves as a valuable look-up table, pre-defining the properties of each instruction and is  
136 instrumental in aiding the Assembler class in the configuration of instruction attributes. Despite  
137 disparities in the implementation of specific components within their data-path, the designers  
138 of the DoMe Simulator are acutely aware that this aspect of the project places a distinct focus  
139 on augmenting the capacity and workflow of their architecture.

## 140 C SURVEY

141 This section delineates the survey questions and presents the responses provided by 50 students.

142 **Question 1** aims to assess participants' perception of their hardware design knowledge and  
143 experience, both before and after the course (Fig. 2).

144 **Question 2** measures the participants' self-reported self-learning ability before and after the  
145 course, which is a vital aspect of their educational growth (Fig. 3).

146 **Question 3** gauges the change in participants' interest in working on low-level systems like  
147 Computer Hardware Engineering from before to after the course, helping understand how the  
148 course impacts their preferences (Fig. 4).

149 **Question 4** investigates participants' awareness of developing software considering hard-  
150 ware limitations before the course, offering insights into their initial perspectives (Fig. 5).

151 **Question 5** focuses on the impact of visual tools on the participants' learning experience  
152 throughout the course, examining how such tools influenced their engagement (Fig. 6).

153 **Question 6** explores the influence of group work on the learning experience, uncovering the  
154 effect of collaborative learning on participants' perceptions (Fig. 7).

155 **Question 7** assesses how hands-on experiences during the course influenced participants,  
156 providing insights into the practical aspects of their learning (Fig. 8).

157 **Question 8** evaluates the effect of designing their own architecture on participants' learning  
158 experience, highlighting the significance of practical application in the course (Fig. 9).

159 **Question 9** measures the impact of simulators and internet-shared tools on participants'  
160 learning experience, indicating the relevance of digital resources (Fig. 10).

161 **Question 10** evaluates the overall satisfaction level of participants with the Computer  
162 Architecture course, summarizing their general contentment (Fig. 11).

163 **Question 11** investigates the alignment between participants' expectations and the course's  
164 content and delivery, offering insights into how well the course met their initial anticipations  
165 (Fig. 12).

166 **Question 12** assesses participants' confidence in their understanding of hardware design  
167 after completing the course, indicating the level of self-assuredness in their knowledge (Fig. 13).

168 **Question 13** aims to measure how well participants believe the course prepared them for  
169 low-level system work like Computer Hardware Engineering (Fig. 14).

170 **Question 14** captures participants' overall enjoyment of the course, providing a holistic  
171 perspective on their satisfaction and engagement with the educational experience (Fig. 15).

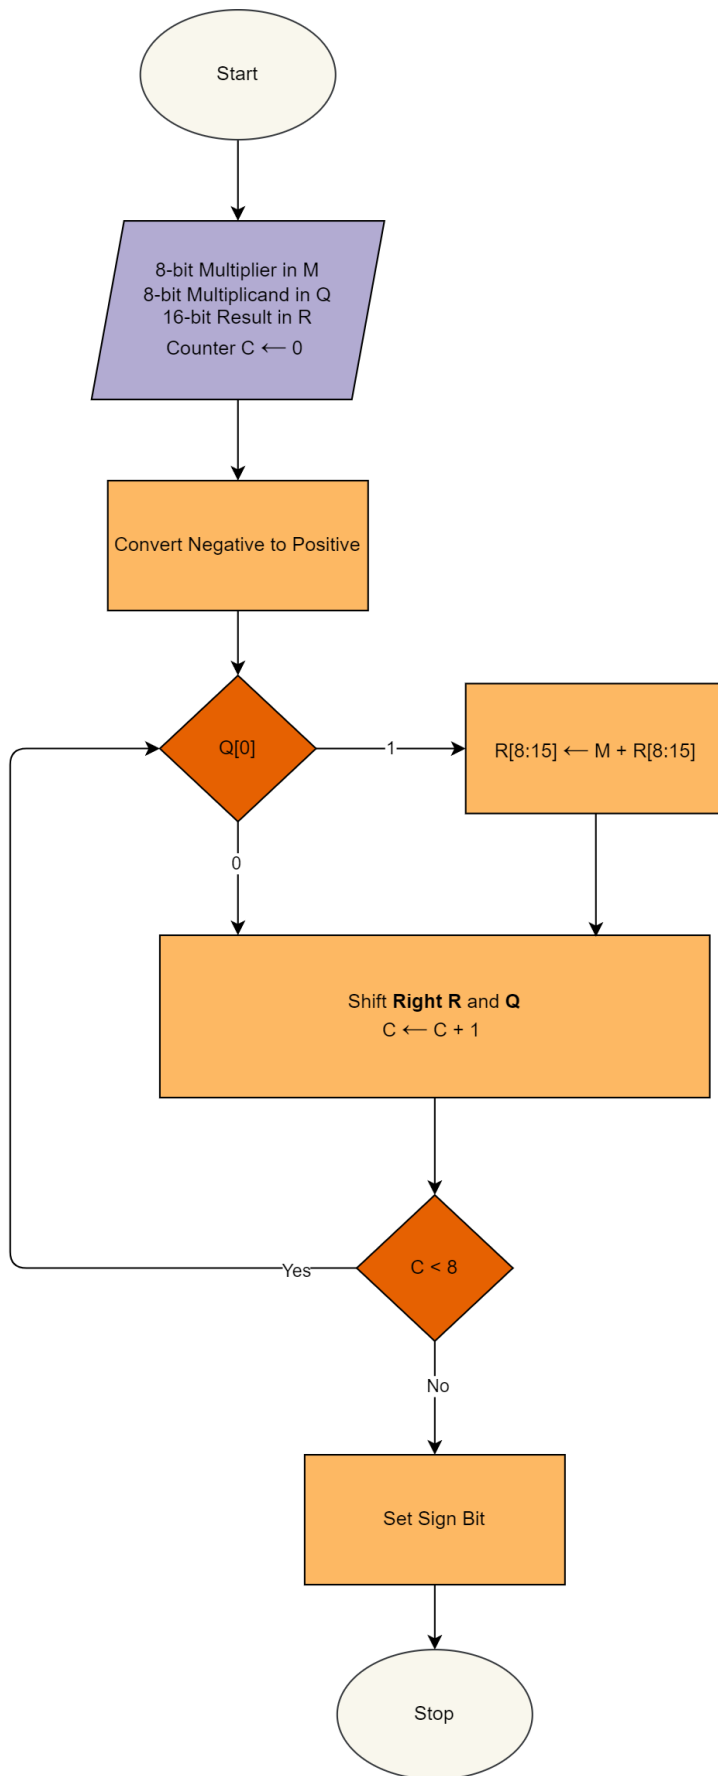

Figure 1. Multiplication Algorithm Flow Chart.

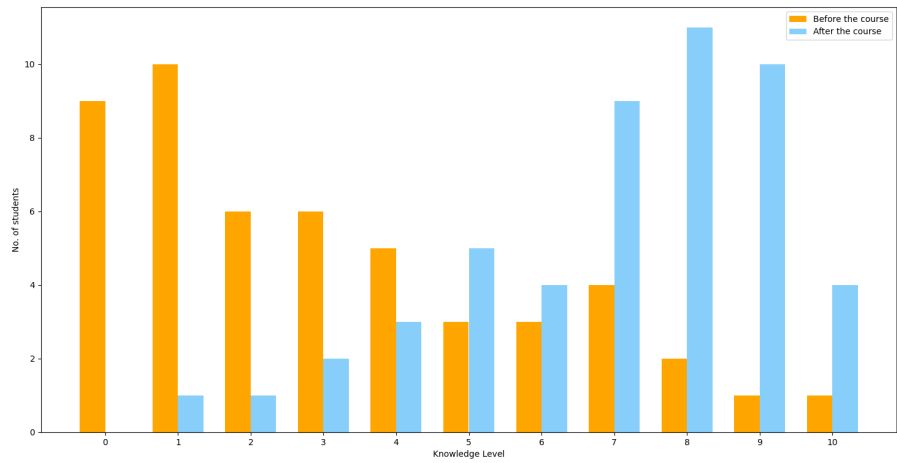

**Figure 2.** Results for "How would you rate your knowledge and experience level about hardware design before/after the course?"

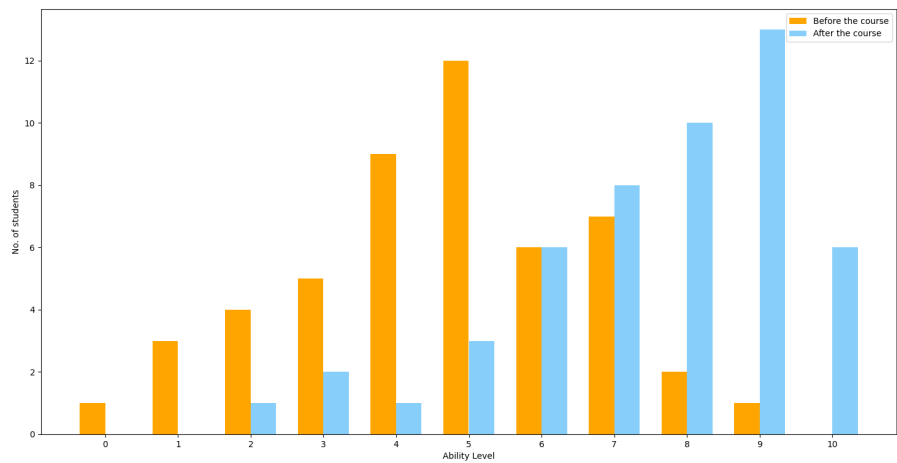

**Figure 3.** Results for "How would you rate your self-learning ability before/after the course?"

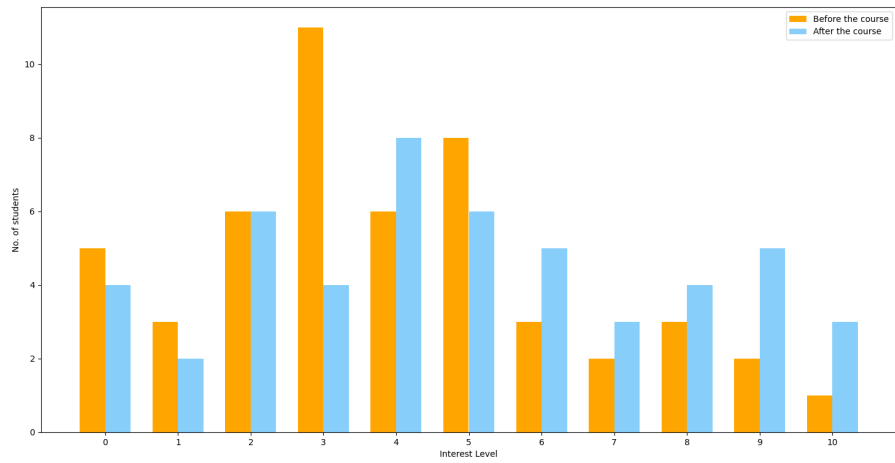

**Figure 4.** Results for "How interested were you in working on low-level systems, such as Computer Hardware Engineering before/after the course?"

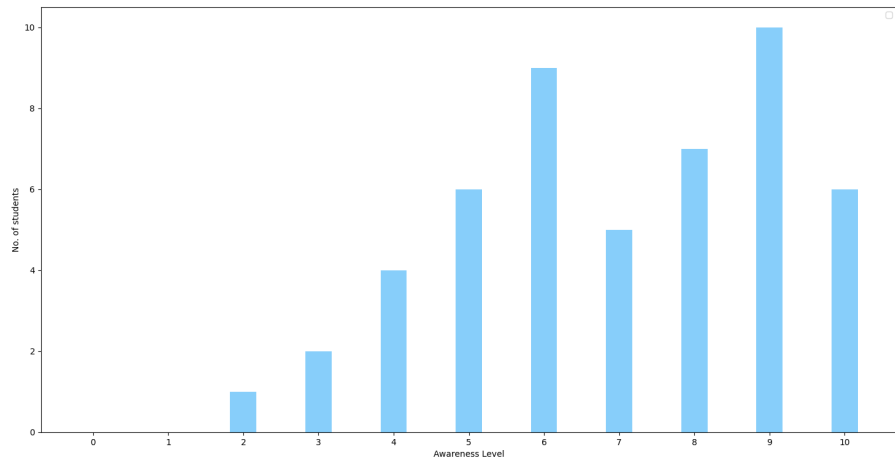

**Figure 5.** Results for "How aware were you of developing software by considering hardware abilities and limitations before the course?"

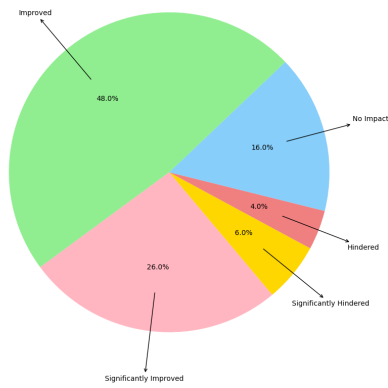

**Figure 6.** Results for "How did the use of visual tools during the course impact your learning experience?"

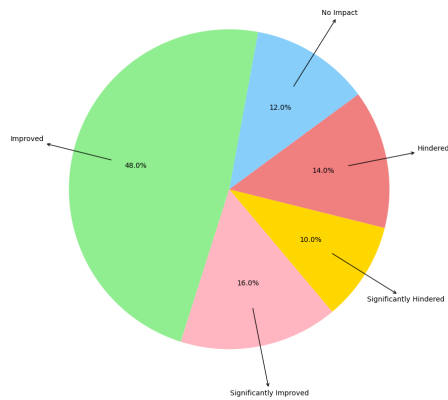

**Figure 7.** Results for "How did working in groups during the course affect your learning experience?"

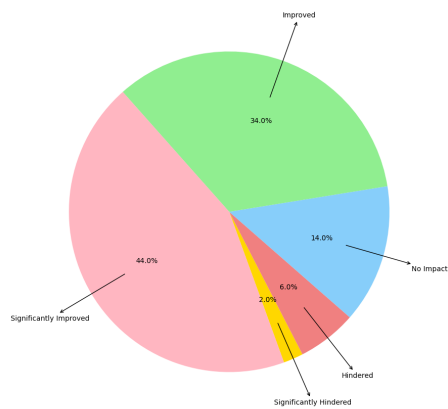

**Figure 8.** Results for "How did hands-on experiences during the course influence your learning experience?"



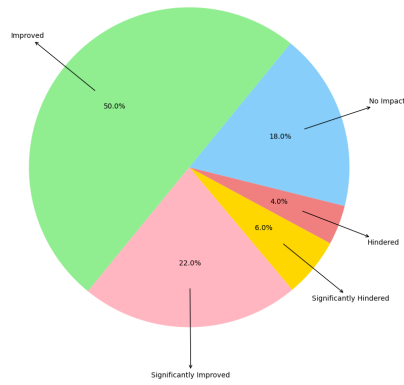

**Figure 9.** Results for "How did implementing and designing your own architecture during the course affect your learning experience?"

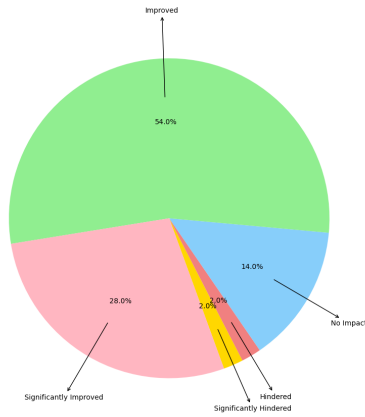

**Figure 10.** Results for "How did using simulators and tools shared on the internet during the course impact your learning experience?"

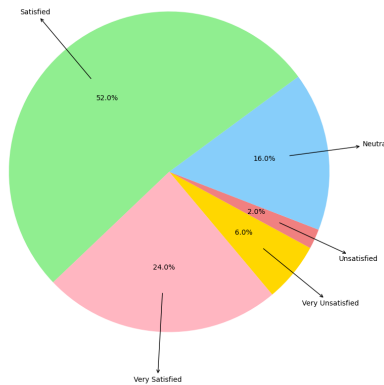

**Figure 11.** Results for "How satisfied were you with the Computer Architecture course?"

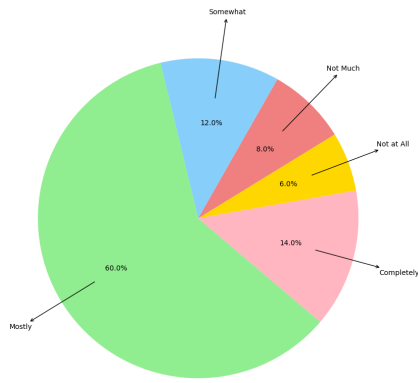

Figure 12. Results for "To what extent did this course meet your expectations?"

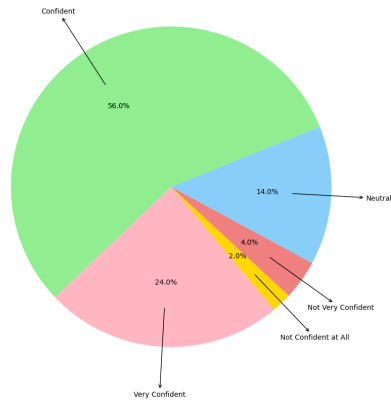

Figure 13. Results for "How confident do you feel in your understanding of hardware design after completing this course?"

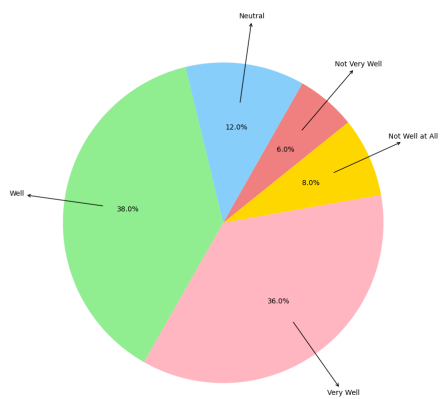

Figure 14. Results for "How well do you think the course prepared you for low-level system work, such as Computer Hardware Engineering?"

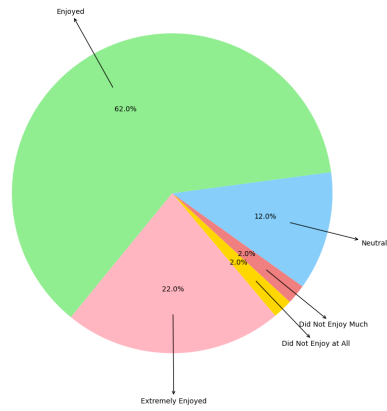

Figure 15. Results for "How would you describe your overall enjoyment of this course?"

Table 1. Instruction Format of each Architecture

|                   |        |       |        |             |        |           |               |           |        |       |
|-------------------|--------|-------|--------|-------------|--------|-----------|---------------|-----------|--------|-------|
| MuSe Architecture | R-Type | Field | opcode | is_jump     | is_imm | rs        | rt            | rd        | unsued | Total |
|                   |        | Bit   | 3      | 1           | 1      | 3         | 3             | 3         | 2      | 16    |
|                   | I-Type | Field | opcode | is_jump     | is_imm | rs        | rt            | immediate |        | Total |
|                   |        | Bit   | 3      | 1           | 1      | 3         | 3             | 5         |        | 16    |
|                   | J-Type | Field | opcode | is_jump     | is_imm | label     |               |           |        | Total |
|                   |        | Bit   | 3      | 1           | 1      | 11        |               |           |        | 16    |
| DoMe Architecture | R-Type | Field | opcode | control_bit | rt     | rs        | function code |           |        | Total |
|                   |        | Bit   | 4      | 1           | 3      | 3         | 5             |           |        | 16    |
|                   | I-Type | Field | opcode | control_bit | rt     | immediate |               |           |        | Total |
|                   |        | Bit   | 4      | 1           | 3      | 8         |               |           |        | 16    |

**Table 2.** Instruction List (*\*Not a MUST instruction*)

|                   |        |        |             |    |    |          |            |           |          |
|-------------------|--------|--------|-------------|----|----|----------|------------|-----------|----------|
| MuSe Architecture | R-Type | 000    | 0           | 0  | rs | rt       | rd         | unused    | ADD      |
|                   |        | 001    | 0           | 0  | rs | rt       | rd         | unused    | SUB      |
|                   |        | 100    | 0           | 0  | rs | rt       | rd         | unused    | MUL      |
|                   |        | 010    | 0           | 0  | rs | rt       | rd         | unused    | AND      |
|                   |        | 011    | 0           | 0  | rs | rt       | rd         | unused    | OR       |
|                   |        | 101    | 0           | 0  | rs | rt       | rd         | unused    | SLL      |
|                   |        | 110    | 0           | 0  | rs | rt       | rd         | unused    | SRL      |
|                   |        | 101    | 1           | 0  | rs | rt       | rd         | unused    | *SYSCALL |
|                   |        | 111    | 0           | 0  | rs | rt       | rd         | unused    | SLT      |
|                   | I-Type | 001    | 1           | 0  | rs | rt       | rd         | unused    | JR       |
|                   |        | 101    | 0           | 1  | rs | rt       | imm[4:0]   |           | LUI      |
|                   |        | 111    | 0           | 1  | rs | rt       | imm[4:0]   |           | SLTI     |
|                   |        | 100    | 0           | 1  | rs | rt       | imm[4:0]   |           | MULI     |
|                   |        | 001    | 0           | 1  | rs | rt       | imm[4:0]   |           | BEQ      |
|                   |        | 011    | 0           | 1  | rs | rt       | imm[4:0]   |           | BNE      |
|                   |        | 000    | 0           | 1  | rs | rt       | imm[4:0]   |           | SW       |
|                   |        | 010    | 0           | 1  | rs | rt       | imm[4:0]   |           | LW       |
|                   |        | J-Type | 000         | 1  | 0  |          |            | imm[10:0] |          |
|                   | 001    |        | 1           | 0  |    |          | imm[10:0]  |           | J        |
| DoMe Architecture | R-Type | 1000   | control_bit | rt | rs |          | 00010      | AND(C)    |          |
|                   |        | 1000   | control_bit | rt | rs |          | 01000      | OR(C)     |          |
|                   |        | 1000   | control_bit | rt | rs |          | 00000      | ADD(C)    |          |
|                   |        | 1000   | control_bit | rt | rs |          | 01101      | SUB(C)    |          |
|                   |        | 1000   | control_bit | rt | rs |          | 01010      | SLT(C)    |          |
|                   |        | 1000   | control_bit | rt | rs |          | 00110      | SRL(C)    |          |
|                   |        | 1000   | control_bit | rt | rs |          | 00101      | MUL(C)    |          |
|                   |        | 1000   | control_bit | rt | rs |          | 01011      | SLL(C)    |          |
|                   |        | 1000   | control_bit | rt | rs |          | 11010      | *SLLV(C)  |          |
|                   |        | 1000   | control_bit | rt | rs |          | 11011      | *XOR(C)   |          |
|                   |        | 1000   | control_bit | rt | rs |          | 10110      | *SRLV(C)  |          |
|                   |        | 1000   | control_bit | rt | rs |          | 10111      | *SRAV(C)  |          |
|                   | I-Type | 1000   | control_bit | rt | rs |          | 11111      | *DIV(C)   |          |
|                   |        | 1110   | 1           | rt |    |          | imm[7:0]   | LUI       |          |
|                   |        | 1100   | 1           | rt |    |          | imm[7:0]   | SLTI      |          |
|                   |        | 1101   | 1           | rt |    |          | imm[7:0]   | MULI      |          |
|                   |        | 0000   | 0           | rt |    |          | imm[7:0]   | BEQ       |          |
|                   |        | 0000   | 1           | rt |    |          | imm[7:0]   | BNE       |          |
|                   |        | 1111   | 1           | rt |    |          | imm[7:0]   | LW        |          |
| J-Type            | 0011   | 1      | rt          |    |    | imm[7:0] | SW         |           |          |
|                   | 0001   | 0      | rt          |    |    | imm[7:0] | J          |           |          |
|                   | 0001   | 1      | rt          |    |    | imm[7:0] | JR         |           |          |
|                   | 1001   | 1      | rt          |    |    | imm[7:0] | JAL        |           |          |
|                   | 0101   | 1      | rt          |    |    | imm[7:0] | *SRA 12/14 |           |          |
|                   | 1011   | 1      | rt          |    |    | imm[7:0] | *ADDI      |           |          |

Table 3. Operation Control Values

| Group Name        | Operation | Operation Control |   |   |   |
|-------------------|-----------|-------------------|---|---|---|
| MuSe Architecture | add       | 0                 | 0 | 0 | - |
|                   | sub       | 0                 | 0 | 1 | - |
|                   | and       | 0                 | 1 | 0 | - |
|                   | or        | 0                 | 1 | 1 | - |
|                   | mul       | 1                 | 0 | 0 | - |
|                   | sll       | 1                 | 0 | 1 | - |
|                   | srl       | 1                 | 1 | 0 | - |
|                   | slt       | 1                 | 1 | 1 | - |
| DoMe Architecture | add       | 0                 | 0 | 0 | 0 |
|                   | sub       | 0                 | 0 | 0 | 1 |
|                   | and       | 0                 | 0 | 1 | 0 |
|                   | or        | 0                 | 0 | 1 | 1 |
|                   | mul       | 0                 | 1 | 0 | 0 |
|                   | sll       | 0                 | 1 | 0 | 1 |
|                   | srl       | 0                 | 1 | 1 | 0 |
|                   | slt       | 0                 | 1 | 1 | 1 |
|                   | div       | 1                 | 0 | 0 | 0 |
| xor               | 1         | 0                 | 0 | 1 |   |

Table 4. MuSe Architecture Control Signal Values

| Format | Instruction | RegDst | ALUSrc | RegWrite | MemRead | MemWrite | Branch | ALUOP | Jump | JumpReg | ShiftReg | Syscall |
|--------|-------------|--------|--------|----------|---------|----------|--------|-------|------|---------|----------|---------|
| R      | add         | 1      | 0      | 1        | 0       | 0        | 0      | 0     | 0    | 0       | 0        | 0       |
|        | sub         | 1      | 0      | 1        | 0       | 0        | 0      | 1     | 0    | 0       | 0        | 0       |
|        | mul         | 1      | 0      | 1        | 0       | 0        | 0      | 100   | 0    | 0       | 0        | 0       |
|        | and         | 1      | 0      | 1        | 0       | 0        | 0      | 10    | 0    | 0       | 0        | 0       |
|        | or          | 1      | 0      | 1        | 0       | 0        | 0      | 11    | 0    | 0       | 0        | 0       |
|        | sll         | 1      | 0      | 1        | 0       | 0        | 0      | 101   | 0    | 0       | 0        | 0       |
|        | srl         | 1      | 0      | 1        | 0       | 0        | 0      | 110   | 0    | 0       | 0        | 0       |
|        | jr          | 1      | 0      | 1        | 0       | 0        | 0      | xxx   | x    | 1       | 1        | 0       |
|        | syscall     | 0      | 0      | 0        | 0       | 0        | 0      | xxx   | x    | 0       | 0        | 1       |
| slt    | 1           | 0      | 1      | 0        | 0       | 0        | 100    | 0     | 0    | 0       | 0        |         |
| I      | lui         | 0      | 1      | 1        | 0       | 0        | 0      | 101   | 0    | 0       | 1        | 0       |
|        | slti        | 0      | 1      | 1        | 0       | 0        | 0      | 100   | 0    | 0       | 0        | 0       |
|        | muli        | 0      | 1      | 1        | 0       | 0        | 0      | 100   | 0    | 0       | 0        | 0       |
|        | beq         | 0      | 0      | 0        | 0       | 0        | 1      | 1     | 0    | 0       | 0        | 0       |
|        | bne         | 1      | 0      | 0        | 0       | 0        | 1      | 1     | 0    | 0       | 0        | 0       |
|        | sw          | 0      | 1      | 0        | 0       | 1        | 0      | 0     | 0    | 0       | 0        | 0       |
| J      | lw          | 0      | 1      | 1        | 1       | 0        | 0      | 0     | 0    | 0       | 0        | 0       |
|        | jal         | 0      | 0      | 1        | 0       | 0        | 0      | xxx   | 1    | 0       | 0        | 0       |
|        | j           | 0      | 0      | 0        | 0       | 0        | 0      | xxx   | 1    | 0       | 0        | 0       |

Table 5. DoMe Architecture Control Signal Values

| Format | Instruction | ALUSrc | RegWrite | MemRead | MemWrite | ALUOp3 | ALUOp2 | ALUOp1 | ALUOp0 | Jump | Branch |
|--------|-------------|--------|----------|---------|----------|--------|--------|--------|--------|------|--------|
| R      | add         | 0      | 1        | 0       | 0        | 0      | 0      | 0      | 0      | 0    | 0      |
|        | sub         | 0      | 1        | 0       | 0        | 0      | 0      | 0      | 1      | 0    | 0      |
|        | mul         | 0      | 1        | 0       | 0        | 0      | 1      | 0      | 0      | 0    | 0      |
|        | and         | 0      | 1        | 0       | 0        | 0      | 0      | 1      | 0      | 0    | 0      |
|        | or          | 0      | 1        | 0       | 0        | 0      | 0      | 1      | 1      | 0    | 0      |
|        | sll         | 0      | 1        | 0       | 0        | 0      | 1      | 0      | 1      | 0    | 0      |
|        | srl         | 0      | 1        | 0       | 0        | 0      | 1      | 1      | 0      | 0    | 0      |
|        | sllv        | 0      | 1        | 0       | 0        | 0      | 1      | 0      | 1      | 0    | 0      |
|        | srlv        | 0      | 1        | 0       | 0        | 0      | 1      | 1      | 0      | 0    | 0      |
|        | div         | 0      | 1        | 0       | 0        | 1      | 0      | 0      | 0      | 0    | 0      |
|        | xor         | 0      | 1        | 0       | 0        | 1      | 0      | 0      | 1      | 0    | 0      |
|        | srav        | 0      | 1        | 0       | 0        | 0      | 1      | 1      | 0      | 0    | 0      |
| slt    | 0           | 1      | 0        | 0       | 0        | 1      | 1      | 1      | 0      | 0    |        |
| I      | lui         | 1      | 1        | 0       | 0        | 0      | 1      | 0      | 1      | 0    | 0      |
|        | slti        | 1      | 1        | 0       | 0        | 0      | 1      | 0      | 0      | 0    | 0      |
|        | muli        | 1      | 1        | 0       | 0        | 0      | 1      | 0      | 0      | 0    | 0      |
|        | beq         | 0      | 0        | x       | 0        | 0      | 0      | 0      | 1      | 0    | 1      |
|        | bne         | 0      | 0        | x       | 0        | 0      | 0      | 0      | 1      | 0    | 1      |
|        | lw          | 1      | 1        | 1       | 0        | 0      | 0      | 0      | 0      | 0    | 0      |
|        | sw          | 1      | 0        | 0       | 1        | 0      | 0      | 0      | 0      | 0    | 0      |
|        | sra         | 1      | 1        | 0       | 0        | 0      | 1      | 1      | 0      | 0    | 0      |
|        | addi        | 1      | 1        | 0       | 0        | 0      | 0      | 0      | 0      | 0    | 0      |
|        | jr          | x      | 0        | x       | 0        | x      | x      | x      | x      | 1    | x      |
|        | jal         | x      | 1        | x       | 0        | x      | x      | x      | x      | 1    | x      |
|        | j           | x      | 0        | x       | 0        | x      | x      | x      | x      | 1    | x      |

172 REFERENCES

173 MIPS (2001). Mips32 architecture for programmers. vol. ii: The mips32 instruction set.  
 174 Patterson, D. A. and Hennessy, J. L. (2016). *Computer organization and design ARM edition: the*  
 175 *hardware software interface*. Morgan kaufmann.  
 176 Wallace, C. S. (1964). A suggestion for a fast multiplier. *IEEE Transactions on Electronic*  
 177 *Computers*, EC-13(1):14–17.
